# Supplementary material for: Comprehensive Characterization and Validation of Chromosome-Specific Highly Polymorphic SSR Markers From Pomegranate (Punica granatum L.) cv. Tunisia Genome
Source: Front Plant Sci. 2021 Mar 16;12:645055. doi: 10.3389/fpls.2021.645055 (PMC8007985; doi:10.3389/fpls.2021.645055)
Supplement: Supplementary Table 5 — Marker statistics for 222 HvSSRT primer pairs validated through PCR on six pomegranate genotypes. [file Table_5.XLSX]

## Sheet: Sheet1
Supplementary Table S5. Marker statistic for 222 HvSSRT primer pairs validated through PCR on six pomegranate genotypes
Sl.No	Primer Name	Allele range	Na	Ne	I	Ho	He	PIC	Amplified on Program
1	HvSSRT_2	188-254	4	1.923	0.94	0.4	0.48	0.533	TD (Touch Down PCR)
2	HvSSRT_9	251-287	5	3.789	1.468	0.833	0.736	0.803	N (Normal PCR )
3	HvSSRT_11	123-171	4	3.6	1.33	0.667	0.722	0.788	N
4	HvSSRT_15	166-176	3	2.667	1.04	0.5	0.625	0.833	N
5	HvSSRT_18	100-118	2	2	0.693	0	0.5	0.545	N
6	HvSSRT_22	164-268	4	3.571	1.332	0.8	0.72	0.8	N
7	HvSSRT_24	194-286	5	3.6	1.424	1	0.722	0.788	N
8	HvSSRT_26	174-195	3	2.133	0.9	0.75	0.531	0.607	N
9	HvSSRT_39	158-255	4	2.286	1.074	0.75	0.563	0.643	N
10	HvSSRT_43	196-268	6	4	1.583	1	0.75	0.818	N
11	HvSSRT_53	151-159	3	2.632	1.03	0.4	0.62	0.689	N
12	HvSSRT_56	261-270	3	2.133	0.9	0.5	0.531	0.607	N
13	HvSSRT_59	130-181	4	2.941	1.221	1	0.66	0.733	N
14	HvSSRT_63	126-149	4	3.429	1.309	0.833	0.708	0.773	N
15	HvSSRT_64	195-269	3	2.632	1.03	0.6	0.62	0.689	N
16	HvSSRT_81	220-235	2	1.8	0.637	0	0.444	0.485	TD
17	HvSSRT_85	190-200	2	1.923	0.673	0	0.48	0.533	TD
18	HvSSRT_88	230-240	2	1.6	0.562	0.5	0.375	0.429	TD
19	HvSSRT_91	161-182	5	4.235	1.517	1	0.764	0.833	N
20	HvSSRT_92	145-173	5	3.789	1.445	1	0.736	0.803	N
21	HvSSRT_94	200-220	2	1.8	0.637	0.333	0.444	0.485	TD
22	HvSSRT_100	117-140	3	2	0.868	0	0.5	0.545	N
23	HvSSRT_101	100-130	3	2.273	0.95	0	0.56	0.622	N
24	HvSSRT_102	181-269	4	3.556	1.321	0.25	0.719	0.821	N
25	HvSSRT_104	100-120	3	2.273	0.95	0.4	0.56	0.622	TD
26	HvSSRT_110	286-300	5	4	1.494	0.5	0.75	0.857	N
27	HvSSRT_111	151-251	5	4	1.494	0.5	0.75	0.857	N
28	HvSSRT_117	183-196	3	2.571	1.011	0.667	0.611	0.733	N
29	HvSSRT_122	120-130	2	1.923	0.673	0	0.48	0.533	TD
30	HvSSRT_129	145-153	3	2.667	1.04	0	0.625	0.714	N
31	HvSSRT_137	220-236	2	1.471	0.5	0	0.32	0.356	TD
32	HvSSRT_143	176-185	2	1.923	0.673	0.4	0.48	0.533	N
33	HvSSRT_145	139-161	4	3.571	1.332	0.8	0.72	0.8	N
34	HvSSRT_147	104-128	5	3.571	1.418	1	0.72	0.8	N
35	HvSSRT_157	131-149	2	1.8	0.637	0	0.444	0.485	N
36	HvSSRT_174	200-210	2	2	0.693	1	0.5	0.545	TD
37	HvSSRT_179	140-155	2	1.882	0.662	0.25	0.469	0.536	TD
38	HvSSRT_180	175-190	4	3.789	1.358	0.833	0.736	0.803	N
39	HvSSRT_187	169-179	2	1.6	0.562	0.5	0.375	0.5	N
40	HvSSRT_188	142-158	4	2.941	1.194	1	0.66	0.733	N
41	HvSSRT_189	284-295	4	2.057	0.983	0.5	0.514	0.561	N
42	HvSSRT_197	120-140	3	2.571	1.011	0	0.611	0.667	TD
43	HvSSRT_200	147-181	5	4	1.494	1	0.75	0.857	N
44	HvSSRT_207	176-197	5	4.545	1.557	1	0.78	0.867	N
45	HvSSRT_210	125-158	5	3.571	1.418	1	0.72	0.8	N
46	HvSSRT_213	191-267	6	3.789	1.54	1	0.736	0.803	N
47	HvSSRT_217	117-139	5	4.545	1.557	0.6	0.78	0.867	N
48	HvSSRT_222	200-214	2	1.8	0.637	0.333	0.444	0.485	TD
49	HvSSRT_224	150-175	3	2.941	1.089	0.8	0.66	0.733	N
50	HvSSRT_225	153-166	3	2.571	1.011	0.667	0.611	0.733	N
51	HvSSRT_230	195-198	2	2	0.693	0	0.5	0.667	N
52	HvSSRT_237	158-263	4	2.909	1.213	0.5	0.656	0.75	N
53	HvSSRT_246	140-150	2	1.385	0.451	0	0.278	0.303	TD
54	HvSSRT_251	180-190	2	1.923	0.673	0	0.48	0.533	TD
55	HvSSRT_254	220-230	2	2	0.693	0	0.5	0.545	TD
56	HvSSRT_259	180-190	2	1.946	0.679	0.5	0.486	0.53	TD
57	HvSSRT_269	160-177	4	3.556	1.321	1	0.719	0.821	N
58	HvSSRT_271	252-283	4	3.333	1.28	1	0.7	0.778	N
59	HvSSRT_272	105-110	2	2	0.693	0	0.5	0.667	N
60	HvSSRT_275	143-164	4	3.556	1.321	1	0.719	0.821	N
61	HvSSRT_276	130-150	3	1.684	0.736	0.5	0.406	0.464	N
62	HvSSRT_278	184-198	3	2.571	1.011	0.667	0.611	0.733	N
63	HvSSRT_279	178-186	3	2	0.868	0.333	0.5	0.6	N
64	HvSSRT_282	190-279	4	3.6	1.33	1	0.722	0.867	N
65	HvSSRT_284	120-130	2	2	0.693	0.333	0.5	0.545	TD
66	HvSSRT_290	220-230	2	2	0.693	0.2	0.5	0.556	TD
67	HvSSRT_293	230-240	2	1.8	0.637	0.333	0.444	0.485	TD
68	HvSSRT_298	140-150	2	1.471	0.5	0	0.32	0.356	TD
69	HvSSRT_302	200-215	2	1.6	0.562	0.5	0.375	0.429	TD
70	HvSSRT_303	200-210	2	2	0.693	0.333	0.5	0.545	TD
71	HvSSRT_311	119-133	3	2.462	0.974	1	0.594	0.679	N
72	HvSSRT_313	169-185	3	2.462	0.974	1	0.594	0.679	N
73	HvSSRT_317	181-200	6	4.545	1.643	1	0.78	0.867	N
74	HvSSRT_318	189-268	7	6	1.864	1	0.833	0.909	N
75	HvSSRT_321	118-138	6	4.5	1.633	0.667	0.778	0.848	N
76	HvSSRT_322	150-175	5	3.13	1.358	0.667	0.681	0.742	N
77	HvSSRT_324	165-196	6	4	1.583	0.5	0.75	0.818	N
78	HvSSRT_335	144-169	3	2.941	1.089	0.2	0.66	0.733	N
79	HvSSRT_336	164-269	3	1.852	0.802	0.6	0.46	0.511	N
80	HvSSRT_341	153-189	6	4.8	1.676	1	0.792	0.864	N
81	HvSSRT_342	144-197	4	3.333	1.28	1	0.7	0.778	N
82	HvSSRT_344	160-180	2	1.8	0.637	0	0.444	0.533	N
83	HvSSRT_348	198-290	5	4.235	1.517	0.833	0.764	0.833	N
84	HvSSRT_349	134-166	3	2.571	1.011	1	0.611	0.667	N
85	HvSSRT_350	150-250	4	3.333	1.28	1	0.7	0.778	N
86	HvSSRT_359	122-127	2	2	0.693	1	0.5	0.6	N
87	HvSSRT_360	200-210	2	1.923	0.673	0.4	0.48	0.533	TD
88	HvSSRT_369	156-168	3	3	1.099	0	0.667	0.8	N
89	HvSSRT_375	131-159	4	3.846	1.366	1	0.74	0.822	N
90	HvSSRT_377	160-250	4	3.6	1.33	1	0.722	0.867	N
91	HvSSRT_383	165-199	7	5.143	1.792	0.667	0.806	0.879	N
92	HvSSRT_389	115-274	4	3.273	1.265	1	0.694	0.758	N
93	HvSSRT_393	161-171	2	1.923	0.673	0.8	0.48	0.533	N
94	HvSSRT_397	145-155	2	1.923	0.673	0.4	0.48	0.533	N
95	HvSSRT_401	160-170	2	1.946	0.679	0.5	0.486	0.53	N
96	HvSSRT_413	160-180	3	2.571	1.011	1	0.611	0.667	N
97	HvSSRT_416	151	1	1	0	0	0	0	N
98	HvSSRT_431	180-200	3	2.571	1.011	0	0.611	0.667	N
99	HvSSRT_432	130-147	2	1.8	0.637	0.333	0.444	0.485	N
100	HvSSRT_435	160-172	2	2	0.693	0	0.5	0.571	TD
101	HvSSRT_437	120-135	2	2	0.693	0	0.5	0.545	N
102	HvSSRT_439	168-275	7	6	1.864	1	0.833	0.909	TD
103	HvSSRT_444	115-160	5	4.167	1.505	0.4	0.76	0.844	TD
104	HvSSRT_451	220-230	2	1.6	0.562	0	0.375	0.429	N
105	HvSSRT_456	190-200	2	1.471	0.5	0	0.32	0.356	N
106	HvSSRT_460	126-162	5	3.789	1.445	1	0.736	0.803	TD
107	HvSSRT_463	190-271	7	6.545	1.907	0.833	0.847	0.924	N
108	HvSSRT_464	229-295	4	3.789	1.358	1	0.736	0.803	TD
109	HvSSRT_465	150-166	2	1.923	0.673	0	0.48	0.533	N
110	HvSSRT_466	170-278	8	7.2	2.023	1	0.861	0.939	TD
111	HvSSRT_470	105-145	5	4.8	1.589	0.833	0.792	0.864	N
112	HvSSRT_475	148-172	4	3.2	1.255	1	0.688	0.786	N
113	HvSSRT_480	135-154	4	3.6	1.33	0.833	0.722	0.788	N
114	HvSSRT_483	100-115	3	2.632	1.03	0.6	0.62	0.689	N
115	HvSSRT_487	150-196	7	6	1.864	1	0.833	0.909	N
116	HvSSRT_490	100-128	4	2.4	1.075	0.667	0.583	0.636	N
117	HvSSRT_497	160-175	2	1.8	0.637	0.333	0.444	0.485	TD
118	HvSSRT_504	170-180	2	1.8	0.637	0.333	0.444	0.485	TD
119	HvSSRT_505	148-178	6	5.538	1.748	1	0.819	0.894	N
120	HvSSRT_509	137-158	3	2.667	1.04	0.5	0.625	0.833	N
121	HvSSRT_512	102-113	2	1.18	0.287	0.167	0.153	0.167	N
122	HvSSRT_513	173-295	8	6.25	1.973	1	0.84	0.933	N
123	HvSSRT_514	130-140	2	1.6	0.562	0	0.375	0.429	TD
124	HvSSRT_517	280-300	2	1.923	0.673	0	0.48	0.533	TD
125	HvSSRT_520	183-193	3	2.133	0.9	0.5	0.531	0.607	N
126	HvSSRT_523	170-198	4	2.778	1.168	0.8	0.64	0.711	N
127	HvSSRT_524	157-175	5	4.5	1.545	0.833	0.778	0.848	N
128	HvSSRT_532	116-144	5	4.5	1.561	0.833	0.778	0.848	N
129	HvSSRT_533	136-158	4	3.556	1.321	1	0.719	0.821	N
130	HvSSRT_536	143-173	4	2.381	1.089	0.4	0.58	0.644	N
131	HvSSRT_538	120-155	4	3.333	1.28	1	0.7	0.778	N
132	HvSSRT_555	169-182	3	2.462	0.974	0.75	0.594	0.679	N
133	HvSSRT_560	140-155	3	2.133	0.9	0.25	0.531	0.607	N
134	HvSSRT_565	114-150	3	2.571	1.011	0.333	0.611	0.733	TD
135	HvSSRT_571	170-190	5	4	1.474	1	0.75	0.818	N
136	HvSSRT_573	176-184	3	2.462	0.974	1	0.594	0.679	N
137	HvSSRT_581	125-140	2	1.8	0.637	0	0.444	0.485	N
138	HvSSRT_587	170-180	2	1.471	0.5	0	0.32	0.356	N
139	HvSSRT_589	180-190	2	2	0.693	0	0.5	0.545	N
140	HvSSRT_592	164-210	5	4	1.474	1	0.75	0.818	N
141	HvSSRT_594	188-257	4	3.789	1.358	1	0.736	0.803	TD
142	HvSSRT_603	143-255	6	5.143	1.705	0.667	0.806	0.879	TD
143	HvSSRT_605	160-170	2	1.471	0.5	0.4	0.32	0.356	N
144	HvSSRT_608	177-253	5	4.5	1.561	1	0.778	0.848	TD
145	HvSSRT_609	160-175	2	2	0.693	1	0.5	0.571	TD
146	HvSSRT_611	170-190	6	5.556	1.748	0.8	0.82	0.911	TD
147	HvSSRT_628	200-210	2	1.8	0.637	0.333	0.444	0.485	N
148	HvSSRT_639	100-110	2	1.8	0.637	0.667	0.444	0.485	N
149	HvSSRT_648	267-297	6	4.167	1.609	1	0.76	0.844	N
150	HvSSRT_651	176-258	6	5.556	1.748	1	0.82	0.911	TD
151	HvSSRT_653	110-125	4	2.667	1.127	0.167	0.625	0.682	N
152	HvSSRT_661	126-145	4	3.13	1.237	0.833	0.681	0.742	TD
153	HvSSRT_665	160-175	2	1.385	0.451	0.333	0.278	0.303	N
154	HvSSRT_667	122-125	2	2	0.693	0	0.5	0.667	N
155	HvSSRT_668	176-199	5	3.571	1.418	0.6	0.72	0.8	N
156	HvSSRT_669	120-145	5	4.167	1.505	1	0.76	0.844	TD
157	HvSSRT_672	150-165	2	1.6	0.562	0	0.375	0.429	TD
158	HvSSRT_680	161-233	6	4	1.583	1	0.75	0.818	N
159	HvSSRT_684	120-280	5	4	1.494	1	0.75	0.857	TD
160	HvSSRT_692	180-190	2	2	0.693	0.333	0.5	0.545	TD
161	HvSSRT_695	200-210	2	1.946	0.679	0.5	0.486	0.53	TD
162	HvSSRT_697	108-120	3	2.632	1.03	0.6	0.62	0.689	N
163	HvSSRT_699	157-184	5	3.571	1.418	0.8	0.72	0.8	TD
164	HvSSRT_700	180-199	4	3.846	1.366	1	0.74	0.822	N
165	HvSSRT_704	100-163	4	2.381	1.089	0.4	0.58	0.644	N
166	HvSSRT_711	146-185	4	3.333	1.28	0.8	0.7	0.778	N
167	HvSSRT_713	265-284	5	4.545	1.557	0.8	0.78	0.867	N
168	HvSSRT_714	105-144	6	5	1.696	1	0.8	0.889	N
169	HvSSRT_721	134-168	3	2.273	0.95	0.8	0.56	0.622	N
170	HvSSRT_724	137-150	4	2.941	1.194	1	0.66	0.733	N
171	HvSSRT_727	126-146	2	1.8	0.637	0.667	0.444	0.533	N
172	HvSSRT_728	128-153	5	4.235	1.517	0.667	0.764	0.833	N
173	HvSSRT_729	262-296	4	3.2	1.255	1	0.688	0.786	N
174	HvSSRT_730	274-295	4	3.6	1.33	1	0.722	0.867	N
175	HvSSRT_736	190-200	2	1.8	0.637	0.333	0.444	0.485	TD
176	HvSSRT_737	116-129	6	4	1.583	1	0.75	0.818	N
177	HvSSRT_740	115-126	2	1.946	0.679	0.833	0.486	0.53	TD
178	HvSSRT_742	120-130	2	2	0.693	0	0.5	0.545	N
179	HvSSRT_744	150-160	2	2	0.693	0	0.5	0.545	N
180	HvSSRT_746	170-180	2	2	0.693	0.333	0.5	0.545	N
181	HvSSRT_747	260-284	4	3.789	1.358	1	0.736	0.803	TD
182	HvSSRT_750	128-176	6	5.143	1.705	1	0.806	0.879	N
183	HvSSRT_751	126-172	6	5	1.696	1	0.8	0.889	N
184	HvSSRT_754	170-180	2	1.8	0.637	0.333	0.444	0.485	N
185	HvSSRT_759	117-137	3	2.323	0.918	0.167	0.569	0.621	TD
186	HvSSRT_762	132-192	6	5	1.696	1	0.8	0.889	TD
187	HvSSRT_773	250-260	2	1.8	0.637	0.333	0.444	0.485	TD
188	HvSSRT_778	200-220	2	1.923	0.673	0	0.48	0.533	N
189	HvSSRT_782	100-262	2	1.6	0.562	0	0.375	0.429	TD
190	HvSSRT_786	281-355	6	4.5	1.633	1	0.778	0.848	TD
191	HvSSRT_787	220-230	2	2	0.693	0.333	0.5	0.545	N
192	HvSSRT_788	255-273	4	2.769	1.144	1	0.639	0.697	TD
193	HvSSRT_799	129-132	3	2.667	1.028	0.5	0.625	0.682	TD
194	HvSSRT_812	150-160	3	3	1.099	0	0.667	0.727	TD
195	HvSSRT_813	100-110	2	1.6	0.562	0	0.375	0.429	N
196	HvSSRT_818	190-200	2	2	0.693	1	0.5	0.571	N
197	HvSSRT_819	220-235	2	1.471	0.5	0	0.32	0.356	N
198	HvSSRT_820	152-178	5	3.6	1.424	0.833	0.722	0.788	N
199	HvSSRT_823	160-170	2	1.923	0.673	0	0.48	0.533	N
200	HvSSRT_825	100-115	2	2	0.693	0	0.5	0.545	N
201	HvSSRT_826	130-145	2	1.6	0.562	0.167	0.375	0.409	N
202	HvSSRT_827	170-185	3	2.571	1.011	0	0.611	0.667	N
203	HvSSRT_831	114-134	4	3.846	1.366	1	0.74	0.822	N
204	HvSSRT_834	120-130	2	1.8	0.637	0	0.444	0.485	TD
205	HvSSRT_835	120-130	2	1.923	0.673	0	0.48	0.533	N
206	HvSSRT_840	170-213	6	5.143	1.705	0.667	0.806	0.879	N
207	HvSSRT_843	255-297	7	5.143	1.792	0.667	0.806	0.879	TD
208	HvSSRT_853	139-150	2	1.8	0.637	0.333	0.444	0.485	N
209	HvSSRT_866	140-150	2	1.923	0.673	0	0.48	0.533	N
210	HvSSRT_867	157-180	4	3.846	1.366	1	0.74	0.822	TD
211	HvSSRT_868	170-180	2	2	0.693	0.333	0.5	0.545	N
212	HvSSRT_869	138-151	3	2.571	1.011	0	0.611	0.667	TD
213	HvSSRT_871	162-202	6	4.167	1.609	0.8	0.76	0.844	TD
214	HvSSRT_874	118-136	6	4	1.583	1	0.75	0.818	TD
215	HvSSRT_876	102-120	3	2.88	1.078	1	0.653	0.712	TD
216	HvSSRT_879	174-275	7	6	1.864	1	0.833	0.909	N
217	HvSSRT_882	126-156	6	5.143	1.705	1	0.806	0.879	TD
218	HvSSRT_889	117-146	2	1.6	0.562	0.5	0.375	0.5	TD
219	HvSSRT_891	197-264	7	6.4	1.906	1	0.844	0.964	TD
220	HvSSRT_893	168-198	4	3.333	1.28	1	0.7	0.778	N
221	HvSSRT_897	160-188	4	3.13	1.237	0.5	0.681	0.742	N
222	HvSSRT_898	122-142	5	4.235	1.517	1	0.764	0.833	TD
		Mean	3.59 (797)	2.97643	1.08417	0.576405	0.605198	0.675842
		Expected product
Amplified in one genotype
223	HvSSRT_258	200	_	_	_	_	_	_	TD
224	HvSSRT_702	132	_	_	_	_	_	_	N
225	HvSSRT_900	167	_	_	_	_	_	_	N
Not amplified
226	HvSSRT_6	202	_	_	_	_	_	_	N
227	HvSSRT_74	127	_	_	_	_	_	_	TD
228	HvSSRT_118	172	_	_	_	_	_	_	TD
229	HvSSRT_159	144	_	_	_	_	_	_	TD
230	HvSSRT_314	117	_	_	_	_	_	_	TD
231	HvSSRT_492	216	_	_	_	_	_	_	TD
232	HvSSRT_600	183	_	_	_	_	_	_	TD
233	HvSSRT_650	265	_	_	_	_	_	_	N
234	HvSSRT_749	164	_	_	_	_	_	_	TD
235	HvSSRT_754	176	_	_	_	_	_	_	TD
